# Supplementary material for: Development of a 63K SNP Array for Cotton and High-Density Mapping of Intraspecific and Interspecific Populations of Gossypium spp
Source: PubMed Central journal article supplement (PMC4478548; doi:10.1534/g3.115.018416), 2015-04-22
Supplement: supp_g3.115.018416_018416SI.pdf [file supp_g3.115.018416_018416SI.pdf]

## Development of a 63K SNP Array for Cotton and High-density Mapping of Intra- and Inter-specific Populations of *Gossypium* spp.

Amanda M. Hulse-Kemp<sup>1,2</sup>, Jana Lemm<sup>3</sup>, Joerg Plieske<sup>3</sup>, Hamid Ashrafi<sup>4</sup>, Ramesh Buyyarapu<sup>5</sup>, David D. Fang<sup>6</sup>, James Frelichowski<sup>7</sup>, Marc Giband<sup>8,9</sup>, Steve Hague<sup>1</sup>, Lori L. Hinze<sup>7</sup>, Kelli J. Kochan<sup>10</sup>, Penny K. Riggs<sup>10,2</sup>, Jodi A. Scheffler<sup>11</sup>, Joshua A. Udall<sup>12</sup>, Mauricio Ulloa<sup>13</sup>, Shirley S. Wang<sup>7</sup>, Qian-Hao Zhu<sup>14</sup>, Sumit K. Bag<sup>15</sup>, Archana Bhardwaj<sup>15</sup>, John J. Burke<sup>13</sup>, Robert L. Byers<sup>12</sup>, Michel Claverie<sup>8</sup>, Michael A. Gore<sup>16</sup>, David B. Harker<sup>12</sup>, Md S. Islam<sup>6</sup>, Johnie N. Jenkins<sup>17</sup>, Don C. Jones<sup>18</sup>, Jean-Marc Lacape<sup>8</sup>, Danny J. Llewellyn<sup>14</sup>, Richard G. Percy<sup>7</sup>, Alan E. Pepper<sup>19,2</sup>, Jesse A. Poland<sup>20</sup>, Krishan Mohan Rai<sup>15</sup>, Samir V. Sawant<sup>15</sup>, Sunil Kumar Singh<sup>15</sup>, Andrew Spriggs<sup>14</sup>, Jen M. Taylor<sup>14</sup>, Fei Wang<sup>1</sup>, Scott M. Yourstone<sup>12</sup>, Xiuting Zheng<sup>1</sup>, Cindy T. Lawley<sup>21</sup>, Martin W. Ganai<sup>3</sup>, Allen Van Deynze<sup>4</sup>, Iain W. Wilson<sup>14</sup>, David M. Stelly<sup>1,2,22</sup>

<sup>1</sup>Department of Soil & Crop Sciences, Texas A&M University, College Station, Texas 77843, USA

<sup>2</sup>Interdisciplinary Degree Program in Genetics, Texas A&M University, College Station, Texas 77843, USA

<sup>3</sup>TraitGenetics GmbH, 06466 Gatersleben, Germany

<sup>4</sup>Department of Plant Sciences and Seed Biotechnology Center, University of California-Davis, Davis, California 95616, USA

<sup>5</sup>Dow AgroSciences, Trait Genetics & Technologies, Indianapolis, Indiana 46268, USA

<sup>6</sup>USDA-ARS-SRRC, Cotton Fiber Bioscience Research Unit, New Orleans, Louisiana 70124, USA

<sup>7</sup>USDA-ARS-SPARC, Crop Germplasm Research Unit, College Station, Texas 77845, USA

<sup>8</sup>CIRAD, UMR AGAP, Montpellier, F34398, France

<sup>9</sup>EMBRAPA, Algodão, Nucleo Cerrado, 75.375-000 Santo Antônio de Goias, GO, Brazil

<sup>10</sup>Department of Animal Science, Texas A&M University, College Station, Texas, 77843, USA

<sup>11</sup>USDA-ARS, Jamie Whitten Delta States Research Center, Stoneville, Mississippi 38776, USA

<sup>12</sup>Brigham Young University, Plant and Wildlife Science Department, Provo, Utah 84602, USA

<sup>13</sup>USDA-ARS, PA, Plant Stress and Germplasm Development Research Unit, Lubbock, Texas 79415, USA

<sup>14</sup>CSIRO Agriculture Flagship, Black Mountain Laboratories, ACT 2601, Australia

<sup>15</sup>CSIR-National Botanical Research Institute, Plant Molecular Biology Division, Lucknow-226001, UP, India

<sup>16</sup>Plant Breeding and Genetics Section, School of Integrative Plant Science, Cornell University, Ithaca, New York, 14853, USA

<sup>17</sup>USDA-ARS, Genetics and Precision Agriculture Research, Mississippi State, Mississippi, 39762, USA

<sup>18</sup>Cotton Incorporated, Agricultural Research, Cary, North Carolina, 27513, USA

<sup>19</sup>Department of Biology, Texas A&M University, College Station, Texas, 77843, USA

<sup>20</sup>Wheat Genetics Resource Center, Department of Plant Pathology and Department of Agronomy, Kansas State University, Manhattan, Kansas, 66506, USA

<sup>21</sup>Illumina Inc., 499 Illinois Street, San Francisco, California, 94158, USA

<sup>22</sup>Corresponding Author, email: [stelly@tamu.edu](mailto:stelly@tamu.edu)

Cotton sequences utilized for array construction are available at: <http://www.cottongen.org>

**Corresponding author:** David M. Stelly, Texas A&M University, 370 Olsen Blvd., 2474 TAMU, College Station, TX 77843-2474. 979-845-2745 (Phone). 979-845-0456 (Fax). [stelly@tamu.edu](mailto:stelly@tamu.edu).

DOI: 10.1534/g3.115.018416

A

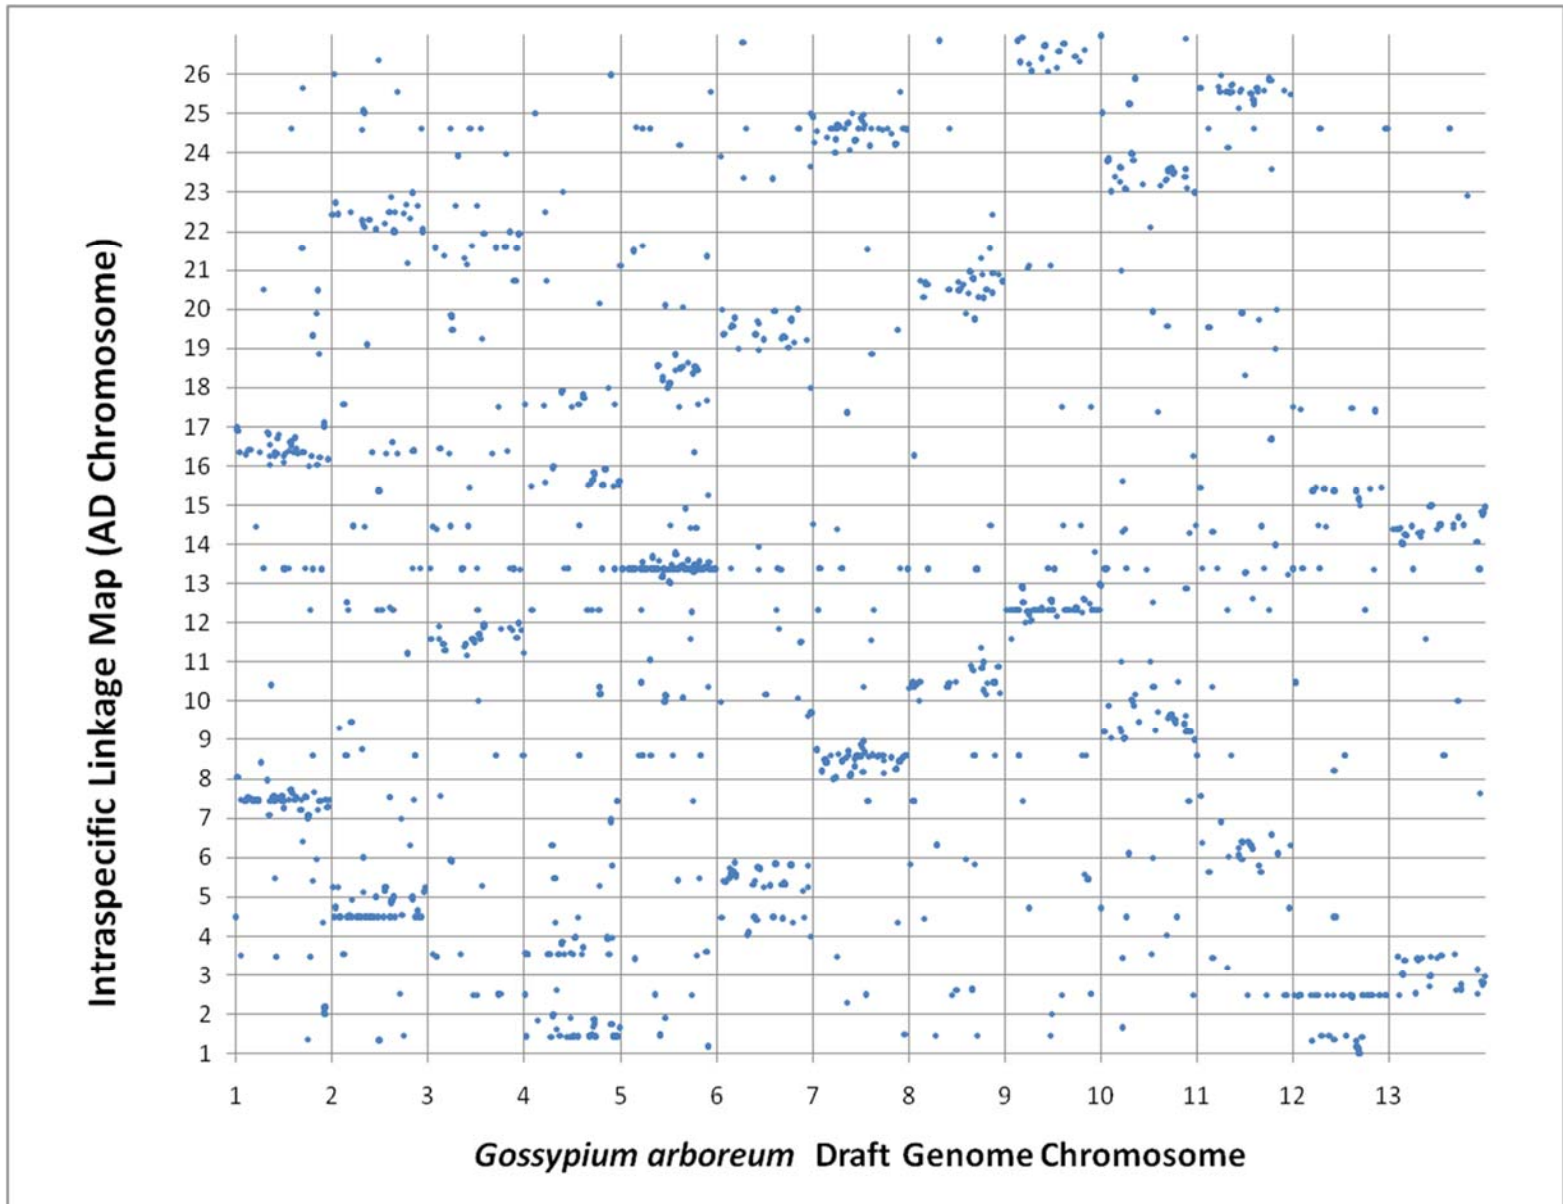

B

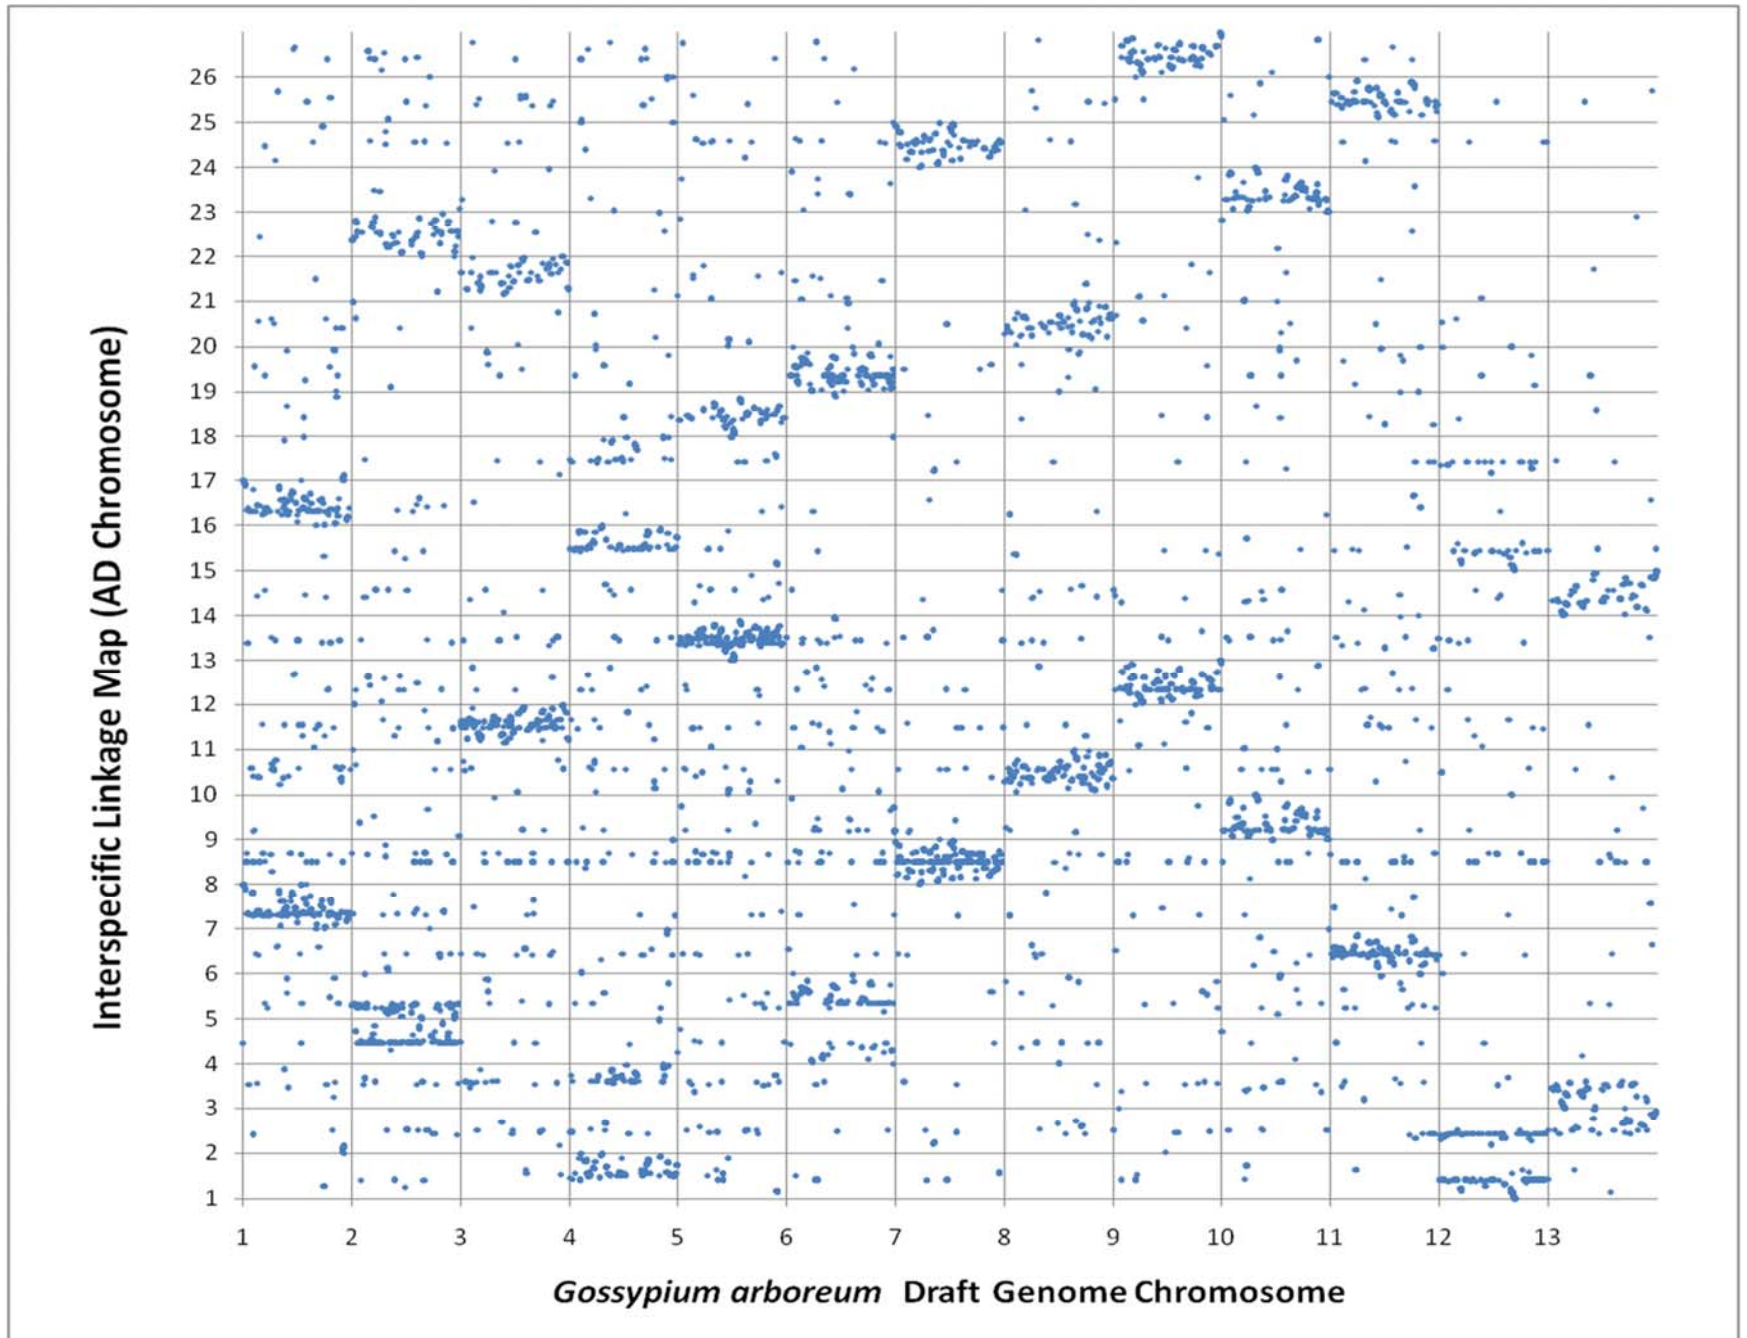

**Figure S1** Dot plot of the syntenic positions of SNP markers in the allotetraploid linkage maps versus the BGI *G. arboreum* draft genome. The 26 allotetraploid chromosomes are shown on the y-axis and the 13 chromosomes of *G. arboreum* are shown on the x-axis. A.) Intra-specific linkage map displaying positions of 3,863 mapped SNP in *G. hirsutum* with alignments to *G. arboreum*. B.) Inter-specific linkage map (*G. hirsutum* genetic standard line Texas Marker -1 by *G. barbadense* line 3-79) displaying positions of 11,344 mapped SNP with alignments to *G. arboreum*.

**Tables S1-S2**

**Available for download at [www.g3journal.org/lookup/suppl/doi:10.1534/g3.115.018416/-/DC1](http://www.g3journal.org/lookup/suppl/doi:10.1534/g3.115.018416/-/DC1)**

**Table S1** Excel spreadsheet listing all 70K markers and their descriptions on the CottonSNP63K.

**Table S2** Excel spreadsheet showing results of assay design of discovery group sets using Illumina's Assay Design Tool.
