# Supplementary material for: Development of a 63K SNP Array for Cotton and High-Density Mapping of Intraspecific and Interspecific Populations of Gossypium spp
Source: PubMed Central journal article supplement (PMC4478548; doi:10.1534/g3.115.018416), 2015-04-22
Supplement: supp_g3.115.018416_FigureS1.pdf [file supp_g3.115.018416_FigureS1.pdf]

A

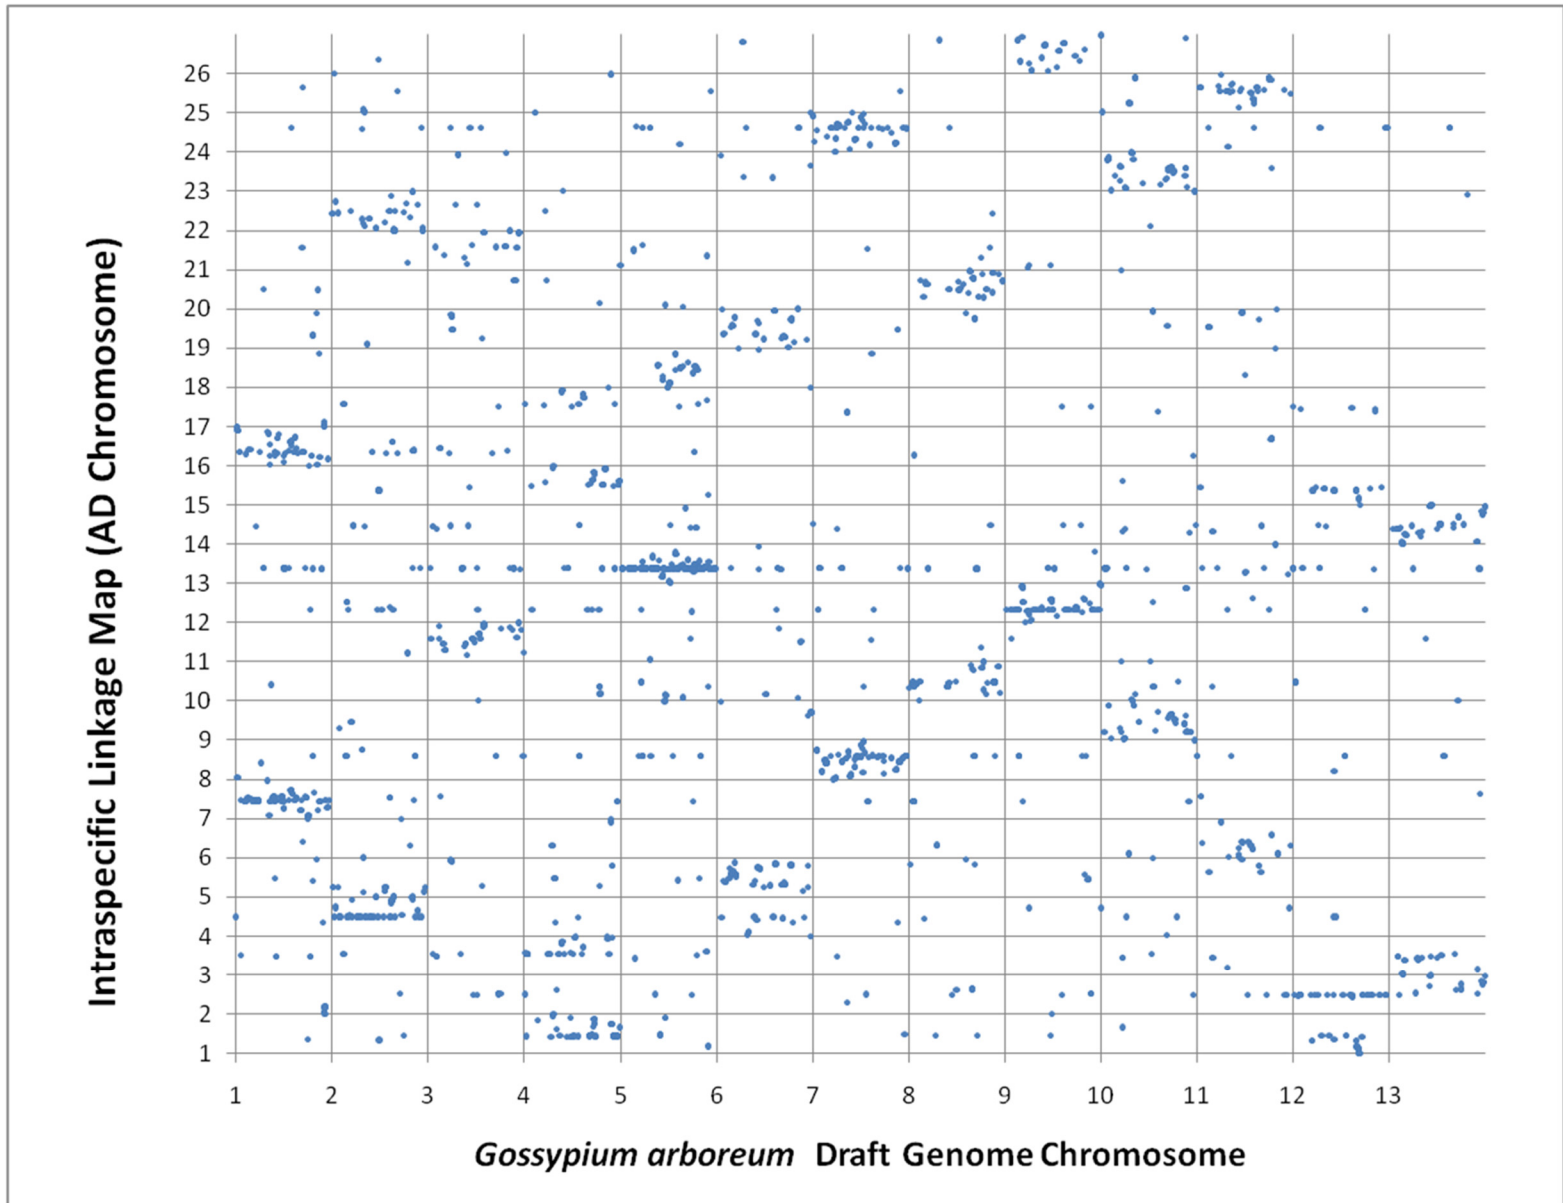

B

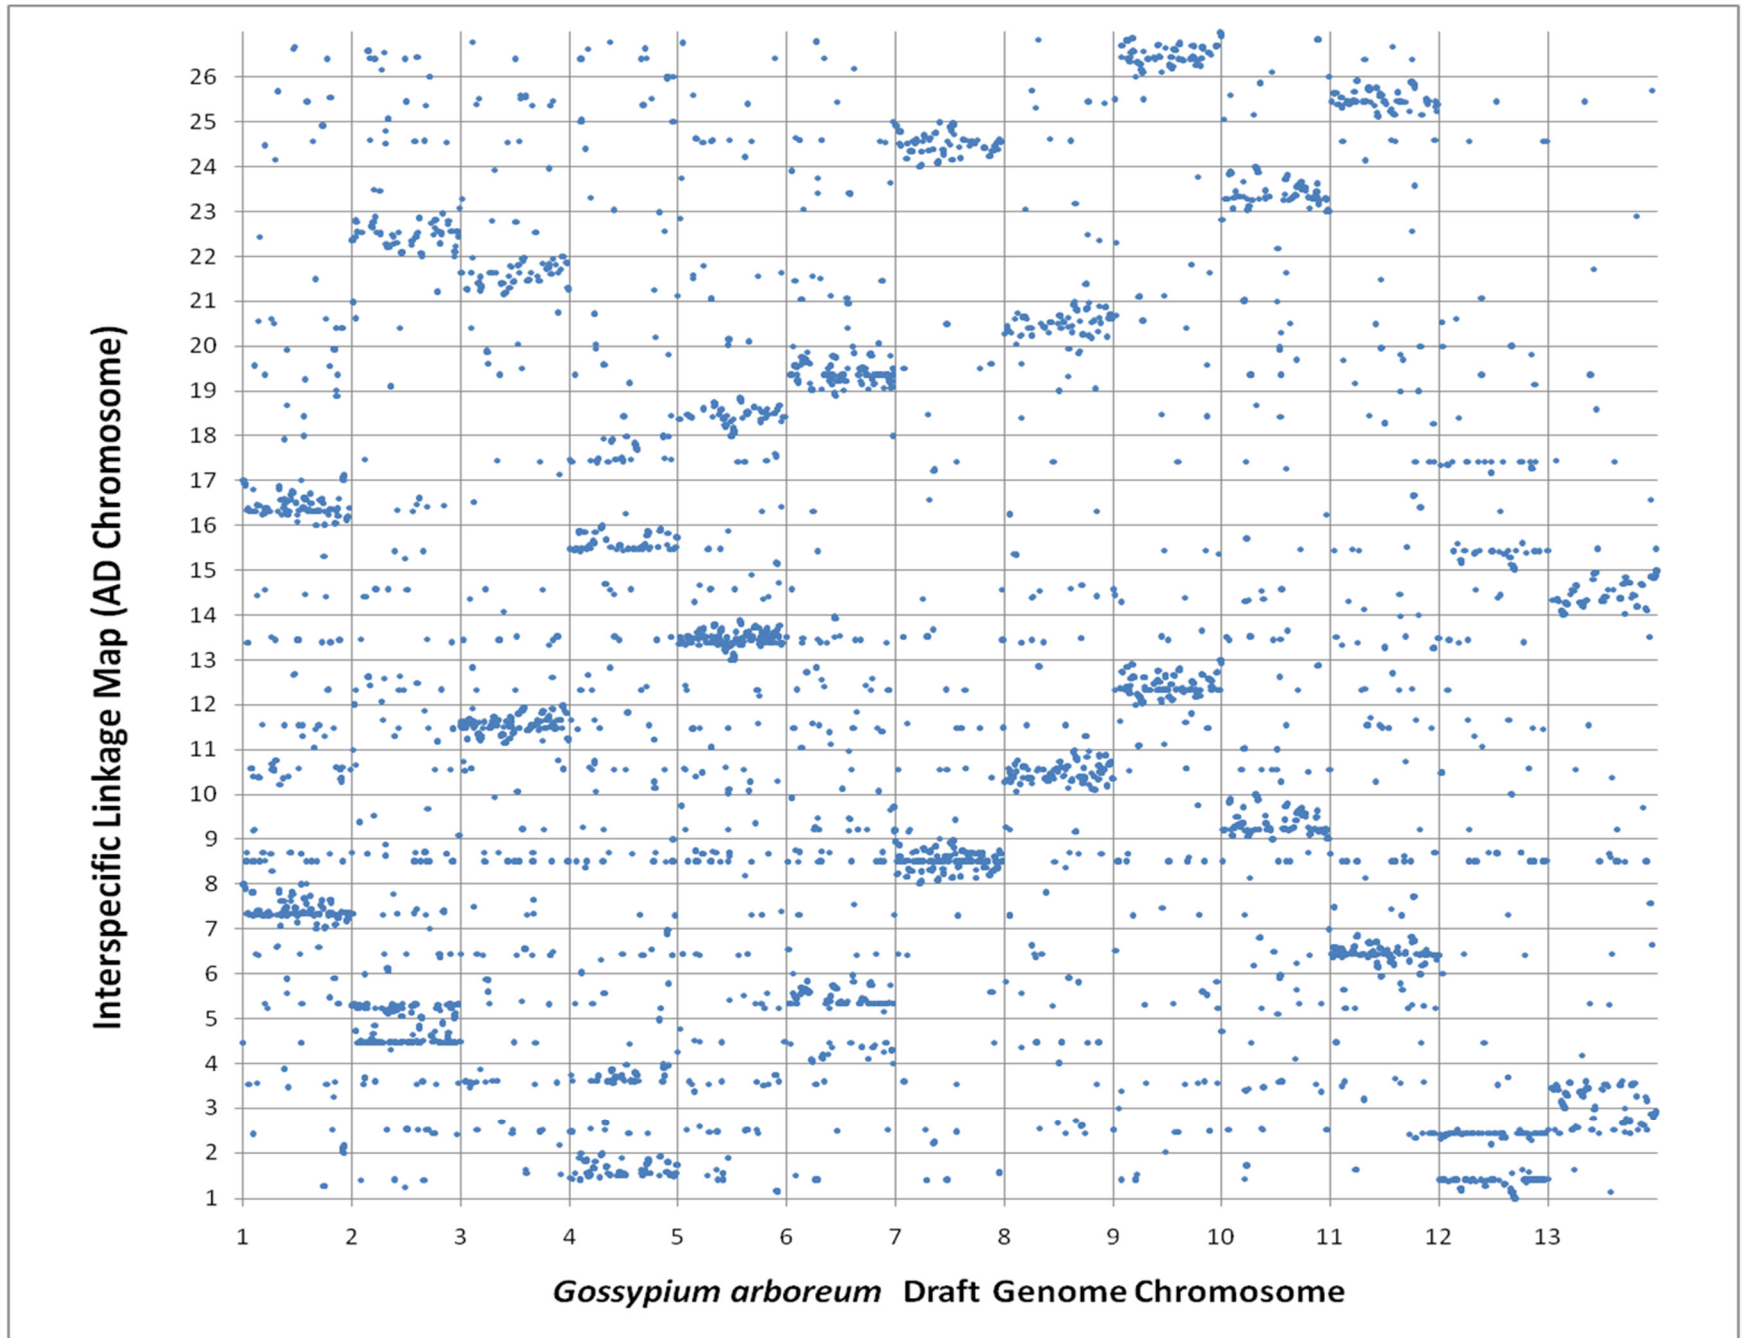

**Figure S1** Dot plot of the syntenic positions of SNP markers in the allotetraploid linkage maps versus the BGI *G. arboreum* draft genome. The 26 allotetraploid chromosomes are shown on the y-axis and the 13 chromosomes of *G. arboreum* are shown on the x-axis. A.) Intra-specific linkage map displaying positions of 3,863 mapped SNP in *G. hirsutum* with alignments to *G. arboreum*. B.) Inter-specific linkage map (*G. hirsutum* genetic standard line Texas Marker -1 by *G. barbadense* line 3-79) displaying positions of 11,344 mapped SNP with alignments to *G. arboreum*.
